# Supplementary material
Source: PubMed Central journal article supplement (PMC10448349)
Supplement: NIHMS1537674-supplement-SI.pdf [file NIHMS1537674-supplement-SI.pdf]

## **Supplemental Material**

### Supplemental Description Neonatal Group Pediatric Data

The neonatal group (up to 30 days of age) in this publication and those of Johnsrud et al. (2003) and Nong et al. (2006) included neonates born both prematurely and full term. Postnatal samples with no reported estimated gestational age in McCarver et al. (2017) are term (23/42). Samples from premature births where there was survival for at least one day were included in the neonatal group because previous studies (Koukouritaki et al., 2002) have demonstrated that birth is more important than gestational age in triggering postnatal changes in XME protein expression.

Table S1. Descriptive statistics for input parameters to Monte Carlo analysis and resultant VmaxC ( $\mu\text{g/hr}\cdot\text{kg BW}$ ) from Monte Carlo analysis

| Age Group                  | Statistic          | Input Parameters <sup>1</sup> |               |                     | VmaxC                                            |
|----------------------------|--------------------|-------------------------------|---------------|---------------------|--------------------------------------------------|
|                            |                    | FVL                           | MPPGL         | CYP2E1 <sup>2</sup> |                                                  |
| 0-30 days, neonate         | N                  | 28                            | 42            | 42                  | 2902<br>4317<br>6.05E-05 – 53726<br>1284<br>3428 |
|                            | Mean               | 0.0412                        | 25.55         | 13.49               |                                                  |
|                            | Standard Deviation | 0.0157                        | 0.0219        | 15.95               |                                                  |
|                            | Range              | 0.0114 – 0.0775               | 25.53 – 25.60 | <LD - 70.10         |                                                  |
|                            | Median             | 0.0438                        | 25.54         | 8.79                |                                                  |
|                            | IQR                | 0.0179                        | 0.0374        | 22.88               |                                                  |
| 31-90 days, infant         | N                  | 18                            | 29            | 29                  | 4572<br>1865<br>506 – 16238<br>4305<br>2378      |
|                            | Mean               | 0.0366                        | 25.68         | 24.10               |                                                  |
|                            | Standard Deviation | 0.0102                        | 0.0396        | 7.54                |                                                  |
|                            | Range              | 0.0145 – 0.0612               | 25.61 – 25.75 | 9.95 – 43.25        |                                                  |
|                            | Median             | 0.0374                        | 25.68         | 23.81               |                                                  |
|                            | IQR                | 0.0099                        | 0.0534        | 7.93                |                                                  |
| 91 days – 2 years, toddler | N                  | 43                            | 47            | 47                  | 11857<br>6402<br>1064 – 63244<br>10530<br>7786   |
|                            | Mean               | 0.0445                        | 26.19         | 45.38               |                                                  |
|                            | Standard Deviation | 0.0159                        | 0.5230        | 20.94               |                                                  |
|                            | Range              | 0.0274 – 0.1200               | 25.76 – 27.36 | 17.92 – 86.07       |                                                  |
|                            | Median             | 0.0399                        | 25.92         | 36.59               |                                                  |
|                            | IQR                | 0.0121                        | 0.6849        | 38.18               |                                                  |
| Adult                      | N                  | 135                           | 101           | 134                 | 10722<br>4707<br>1301 – 42809<br>9918<br>5876    |
|                            | Mean               | 0.0239                        | 35.38         | 59.31               |                                                  |
|                            | Standard Deviation | 0.0090                        | 3.136         | 18.34               |                                                  |
|                            | Range              | 0.0123 – 0.0863               | 29.26 – 40.19 | 23.0 – 130          |                                                  |
|                            | Median             | 0.0217                        | 35.24         | 57.5                |                                                  |
|                            | IQR                | 0.0084                        | 5.84          | 20.0                |                                                  |

<sup>1</sup>Data Sources: FVL (g liver/kg BW, assuming a volumetric density of 1) and CYP2E1 (pmol/mg microsomal protein) were calculated from data in Johnsrud *et al.* (2003) for specific pediatric age groups. FVL for adults was recalculated from Young *et al.* (2009). CYP2E1 for adults is from Lipscomb *et al.* (1997, 2003a, b). MPPGL was estimated on the basis of the equation published in Barter *et al.* (2008) using subject age in years for all age groups.

<sup>2</sup>Approximate limit of detection for CYP2E1 in Johnsrud *et al.* (2003) data was 0.5 pmol/mg microsomal protein. For the neonatal group, 8 of 42 observations were below the limit of detection (LD). LD values were not included in calculations.

Table S2. Akaike information criterion (AIC), corrected AIC (AICC), and Bayesian information criterion (BIC) compared for lognormal and gamma distributions for CYP2E1

| Age Group                     | Distribution | AIC*  | AICC* | BIC*  |
|-------------------------------|--------------|-------|-------|-------|
| 0-30 days,<br>neonate         | Lognormal    | 316.9 | 317.2 | 320.3 |
|                               | Gamma        | 304.5 | 304.8 | 308.0 |
| 31-90 days,<br>infant         | Lognormal    | 200.5 | 200.9 | 203.2 |
|                               | Gamma        | 200.2 | 200.6 | 202.9 |
| 91 days – 2<br>years, toddler | Lognormal    | 414.5 | 414.8 | 418.2 |
|                               | Gamma        | 415.3 | 415.5 | 419.0 |
| Adult                         | Lognormal    | 1147  | 1147  | 1153  |
|                               | Gamma        | 1147  | 1148  | 1153  |

\* A lower value is deemed better

Table S3. Statistical characteristics for maximum concentration of BDCM in blood (CvMax) based on Monte Carlo analysis following oral exposure (single 0.05 L drink, 20 µg/L BDCM in water, 2 hr simulation).

| Age Group | Mean ± SD (ng/L) | % CV | 5 <sup>th</sup> percentile | 95 <sup>th</sup> percentile | Ratio <sup>1</sup> |
|-----------|------------------|------|----------------------------|-----------------------------|--------------------|
| neonate   | 96.6 ± 76.5      | 79.2 | 10.3                       | 234                         | 22.8               |
| infant    | 21.6 ± 8.35      | 38.7 | 11.3                       | 37.1                        | 3.28               |
| toddler   | 5.30 ± 3.07      | 57.9 | 2.08                       | 11.0                        | 5.29               |
| adult     | 0.92 ± 0.40      | 43.4 | 0.44                       | 1.65                        | 3.75               |

<sup>1</sup>Ratio of 95<sup>th</sup> to 5<sup>th</sup> percentile values.

Table S4. Statistical characteristics for maximum concentration of BDCM in blood (CvMax) based on Monte Carlo analysis following bathing exposure (20 minutes, 20 µg/L BDCM in water, 2 hr simulation).

| Age Group | Mean ± SD (ng/L) | % CV | 5 <sup>th</sup> percentile | 95 <sup>th</sup> percentile | Ratio <sup>1</sup> |
|-----------|------------------|------|----------------------------|-----------------------------|--------------------|
| neonate   | 347 ± 91.9       | 26.5 | 254                        | 529                         | 2.08               |
| infant    | 247 ± 9.40       | 3.80 | 236                        | 265                         | 1.12               |
| toddler   | 226 ± 5.54       | 2.45 | 221                        | 236                         | 1.07               |
| adult     | 196 ± 1.95       | 1.00 | 194                        | 199                         | 1.03               |

<sup>1</sup>Ratio of 95<sup>th</sup> to 5<sup>th</sup> percentile values.

Table S5. Ranking of parameter influence based on Morris screening level global sensitivity analysis for oral exposure scenario of a single 0.05 L ingestion of water containing 5 µg/L BDCM for AUCv in neonate and adult.<sup>1</sup>

| Neonate   |          |          | Adult     |          |          |
|-----------|----------|----------|-----------|----------|----------|
| Parameter | μ        | σ        | Parameter | μ        | σ        |
| CYP2E1    | 1.05E-02 | 3.82E-03 | CYP2E1    | 1.24E-04 | 4.32E-05 |
| FVL       | 3.85E-03 | 1.31E-03 | KM1BDCM   | 7.90E-05 | 2.74E-05 |
| KM1BDCM   | 2.18E-03 | 7.38E-04 | FVL       | 7.78E-05 | 2.74E-05 |
| KABDCM    | 1.26E-03 | 6.28E-04 | PLBDCM    | 4.29E-05 | 1.49E-05 |
| PLBDCM    | 1.16E-03 | 3.80E-04 | IVVMAX1   | 4.26E-05 | 1.49E-05 |
| IVVMAX1   | 1.14E-03 | 3.86E-04 | KABDCM    | 3.22E-05 | 1.49E-05 |
| QPC       | 3.28E-04 | 1.27E-04 | MPPGL     | 2.09E-05 | 7.30E-06 |
| PBBDCM    | 3.12E-04 | 1.57E-04 | FQG       | 1.24E-05 | 2.43E-06 |
| RQPCO     | 2.46E-04 | 6.57E-05 | RQPCO     | 1.00E-05 | 2.31E-06 |
| FQG       | 2.37E-04 | 4.06E-05 | FQL       | 6.51E-06 | 1.60E-06 |
| FQF       | 2.26E-04 | 1.03E-04 | QPC       | 5.57E-06 | 1.09E-06 |
| FQL       | 1.88E-04 | 4.20E-05 | PBBDCM    | 4.44E-06 | 2.23E-06 |
| DEADSPACE | 1.30E-04 | 4.66E-05 | FQF       | 4.39E-06 | 2.41E-06 |
| PPPBDCM   | 1.09E-04 | 4.61E-05 | PPPBDCM   | 3.36E-06 | 1.49E-06 |
| PRPBDCM   | 4.87E-05 | 2.64E-05 | DEADSPACE | 2.52E-06 | 5.02E-07 |
| PSKBDCM   | 3.90E-05 | 1.95E-05 | PRPBDCM   | 1.77E-06 | 1.06E-06 |
| PFBDCM    | 3.09E-05 | 2.44E-05 | QSKSA     | 9.72E-07 | 6.18E-07 |
| FSASK     | 3.02E-05 | 9.84E-06 | PSKBDCM   | 9.44E-07 | 4.77E-07 |
| LSK       | 2.89E-05 | 1.64E-05 | FVBD      | 9.11E-07 | 5.15E-07 |
| FVF       | 2.60E-05 | 1.23E-05 | FVF       | 9.00E-07 | 4.08E-07 |
| QSKSA     | 2.42E-05 | 1.40E-05 | FSASK     | 8.13E-07 | 2.73E-07 |
| FVBD      | 1.85E-05 | 1.04E-05 | PGBDCM    | 7.89E-07 | 8.07E-07 |
| PGBDCM    | 1.64E-05 | 1.44E-05 | LSK       | 7.47E-07 | 4.51E-07 |
| FVGI      | 9.04E-06 | 1.15E-05 | FVGI      | 4.87E-07 | 7.22E-07 |
| MPPGL     | 4.75E-06 | 1.60E-06 | PFBDCM    | 2.27E-07 | 1.82E-07 |
| PKBDCM    | 3.61E-06 | 1.97E-06 | PKBDCM    | 8.47E-08 | 5.53E-08 |
| FQK       | 1.14E-06 | 1.59E-06 | FQK       | 7.72E-08 | 9.19E-08 |
| VFCBDCM   | 7.57E-07 | 3.69E-07 | VFCBDCM   | 3.23E-08 | 1.14E-08 |
| FVK       | 5.99E-07 | 5.14E-07 | FVK       | 2.10E-08 | 2.40E-08 |
| VLUM      | 3.87E-10 | 4.07E-10 | VLUM      | 1.25E-19 | 4.61E-20 |

<sup>1</sup>Parameter abbreviations are defined in Tables 1 and 2. μ is the mean sensitivity measure over the course of the simulation and σ is the standard deviation of the sensitivity measure over the course of the simulation. Shading indicates division of parameters into thirds.

Table S6. Ranking of parameter influence based on Morris screening level global sensitivity analysis for oral exposure scenario of a single 0.05 L ingestion of water containing 5 µg/L BDCM for AML in neonate and adult.<sup>1</sup>

| Neonate   |          |          | Adult     |          |          |
|-----------|----------|----------|-----------|----------|----------|
| Parameter | μ        | σ        | Parameter | μ        | σ        |
| KABDCM    | 9.27E-02 | 6.40E-02 | KABDCM    | 9.82E-02 | 6.59E-02 |
| CYP2E1    | 8.39E-02 | 1.27E-02 | CYP2E1    | 1.22E-02 | 1.96E-03 |
| FVL       | 3.13E-02 | 5.30E-03 | KM1BDCM   | 7.78E-03 | 1.26E-03 |
| KM1BDCM   | 1.80E-02 | 2.50E-03 | FVL       | 7.45E-03 | 1.42E-03 |
| IVVMAX1   | 9.80E-03 | 1.39E-03 | IVVMAX1   | 4.03E-03 | 6.43E-04 |
| PLBDCM    | 9.51E-03 | 1.60E-03 | PLBDCM    | 4.00E-03 | 7.50E-04 |
| QPC       | 7.06E-03 | 1.19E-03 | QPC       | 3.58E-03 | 2.37E-03 |
| RQPCO     | 4.36E-03 | 4.82E-04 | RQPCO     | 2.78E-03 | 2.55E-03 |
| DEADSPACE | 3.19E-03 | 5.57E-04 | FQG       | 2.15E-03 | 3.30E-03 |
| PBBDCM    | 2.82E-03 | 1.15E-03 | PGBDCM    | 2.14E-03 | 3.83E-03 |
| FQG       | 1.65E-03 | 8.66E-04 | FVGI      | 2.12E-03 | 3.83E-03 |
| FQF       | 1.64E-03 | 6.82E-04 | MPPGL     | 2.07E-03 | 3.34E-04 |
| FQL       | 1.44E-03 | 3.48E-04 | DEADSPACE | 1.65E-03 | 1.07E-03 |
| PGBDCM    | 9.16E-04 | 1.67E-03 | PBBDCM    | 7.95E-04 | 3.58E-04 |
| FVGI      | 8.60E-04 | 1.64E-03 | FQL       | 5.72E-04 | 1.86E-04 |
| PPPBDCM   | 7.84E-04 | 3.84E-04 | FQF       | 4.94E-04 | 2.74E-04 |
| PRPBDCM   | 3.09E-04 | 2.36E-04 | PPPBDCM   | 3.90E-04 | 1.75E-04 |
| PSKBDCM   | 2.45E-04 | 1.63E-04 | PRPBDCM   | 2.03E-04 | 1.24E-04 |
| PFBDCM    | 2.29E-04 | 1.72E-04 | PSKBDCM   | 1.07E-04 | 5.47E-05 |
| FSASK     | 2.18E-04 | 8.03E-05 | FVF       | 1.04E-04 | 4.85E-05 |
| FVF       | 2.13E-04 | 1.08E-04 | FVBD      | 1.02E-04 | 5.92E-05 |
| LSK       | 1.88E-04 | 1.45E-04 | QSKSA     | 1.01E-04 | 6.46E-05 |
| QSKSA     | 1.73E-04 | 1.12E-04 | LSK       | 8.56E-05 | 5.19E-05 |
| FVBD      | 1.24E-04 | 9.41E-05 | FSASK     | 8.46E-05 | 2.94E-05 |
| MPPGL     | 3.94E-05 | 5.47E-06 | PFBDCM    | 2.57E-05 | 2.08E-05 |
| PKBDCM    | 2.27E-05 | 1.82E-05 | PKBDCM    | 9.67E-06 | 6.24E-06 |
| FQK       | 9.22E-06 | 1.39E-05 | FQK       | 8.82E-06 | 1.03E-05 |
| VFCBDCM   | 6.05E-06 | 1.41E-06 | VFCBDCM   | 3.16E-06 | 5.09E-07 |
| FVK       | 4.56E-06 | 5.09E-06 | FVK       | 2.31E-06 | 2.59E-06 |
| VLUM      | 1.36E-08 | 1.40E-08 | VLUM      | 4.03E-16 | 1.07E-16 |

<sup>1</sup>Parameter abbreviations are defined in Tables 1 and 2. μ is the mean sensitivity measure over the course of the simulation and σ is the standard deviation of the sensitivity measure over the course of the simulation. Shading indicates division of parameters into thirds.

Table S7. Ranking of parameter influence based on Morris screening level global sensitivity analysis for bathing exposure for 20 minutes in water containing 5 µg/L BDCM for AUCv in neonate and adult.<sup>1</sup>

| Neonate   |          |          | Adult     |          |          |
|-----------|----------|----------|-----------|----------|----------|
| Parameter | μ        | σ        | Parameter | μ        | σ        |
| FSASK     | 1.39E-02 | 5.33E-03 | FSASK     | 1.11E-02 | 4.76E-03 |
| KBDCM     | 1.22E-02 | 4.69E-03 | KBDCM     | 9.83E-03 | 4.26E-03 |
| CYP2E1    | 1.20E-02 | 5.88E-03 | QPC       | 8.04E-03 | 3.72E-03 |
| QPC       | 9.64E-03 | 3.94E-03 | RQPCO     | 7.69E-03 | 3.38E-03 |
| RQPCO     | 8.88E-03 | 3.42E-03 | FQG       | 3.73E-03 | 1.93E-03 |
| FVL       | 4.35E-03 | 2.29E-03 | DEADSPACE | 3.69E-03 | 1.71E-03 |
| DEADSPACE | 4.33E-03 | 1.77E-03 | FQL       | 2.11E-03 | 1.09E-03 |
| FQG       | 3.67E-03 | 1.62E-03 | QSKSA     | 1.39E-03 | 1.10E-03 |
| FQL       | 3.18E-03 | 1.41E-03 | PSKBDCM   | 1.38E-03 | 9.51E-04 |
| KM1BDCM   | 2.74E-03 | 1.29E-03 | LSK       | 1.21E-03 | 1.01E-03 |
| PBBDCM    | 1.93E-03 | 9.58E-04 | PBBDCM    | 1.19E-03 | 6.72E-04 |
| FQF       | 1.56E-03 | 7.58E-04 | CYP2E1    | 1.16E-03 | 6.10E-04 |
| PLBDCM    | 1.45E-03 | 6.76E-04 | FQF       | 1.10E-03 | 6.90E-04 |
| IVVMAX1   | 1.42E-03 | 6.71E-04 | PPPBDCM   | 8.86E-04 | 4.68E-04 |
| PSKBDCM   | 1.25E-03 | 1.05E-03 | KM1BDCM   | 7.22E-04 | 3.81E-04 |
| QSKSA     | 1.04E-03 | 1.13E-03 | FVL       | 5.65E-04 | 3.39E-04 |
| LSK       | 9.32E-04 | 1.06E-03 | PRPBDCM   | 4.94E-04 | 3.17E-04 |
| PPPBDCM   | 7.88E-04 | 4.19E-04 | IVVMAX1   | 3.89E-04 | 2.05E-04 |
| PRPBDCM   | 3.03E-04 | 2.57E-04 | PLBDCM    | 3.89E-04 | 2.04E-04 |
| PWSBDCM   | 2.50E-04 | 1.05E-04 | FVBD      | 2.47E-04 | 1.65E-04 |
| PFBDCM    | 2.04E-04 | 1.61E-04 | FVF       | 2.42E-04 | 1.27E-04 |
| FVF       | 1.88E-04 | 9.70E-05 | MPPGL     | 1.93E-04 | 1.02E-04 |
| FVBD      | 1.30E-04 | 1.12E-04 | PWSBDCM   | 1.54E-04 | 7.21E-05 |
| FVGI      | 3.63E-05 | 3.32E-05 | FVGI      | 8.44E-05 | 5.40E-05 |
| PKBDCM    | 2.32E-05 | 2.05E-05 | PFBDCM    | 5.27E-05 | 4.53E-05 |
| PGBDCM    | 1.37E-05 | 9.11E-06 | PKBDCM    | 2.34E-05 | 1.56E-05 |
| FQK       | 9.89E-06 | 1.00E-05 | FQK       | 2.21E-05 | 1.95E-05 |
| MPPGL     | 5.96E-06 | 2.79E-06 | FVK       | 5.92E-06 | 5.33E-06 |
| FVK       | 4.67E-06 | 4.39E-06 | PGBDCM    | 5.48E-06 | 3.61E-06 |
| VFCBDCM   | 7.63E-07 | 4.28E-07 | VFCBDCM   | 3.00E-07 | 1.60E-07 |

<sup>1</sup>Parameter abbreviations are defined in Tables 1 and 2. μ is the mean sensitivity measure over the course of the simulation and σ is the standard deviation of the sensitivity measure over the course of the simulation. Shading indicates division of parameters into thirds.

Table S8. Ranking of parameter influence based on Morris screening level global sensitivity analysis for bathing exposure for 20 minutes in water containing 5 µg/L BDCM for AML in neonate and adult.<sup>1</sup>

| Neonate   |          |          | Adult     |          |          |
|-----------|----------|----------|-----------|----------|----------|
| Parameter | $\mu$    | $\sigma$ | Parameter | $\mu$    | $\sigma$ |
| FSASK     | 1.53E-01 | 5.94E-02 | FSASK     | 1.25E+00 | 5.52E-01 |
| KBDCM     | 1.35E-01 | 5.26E-02 | KBDCM     | 1.11E+00 | 4.96E-01 |
| CYP2E1    | 1.03E-01 | 3.31E-02 | RQPCO     | 3.80E-01 | 1.45E-01 |
| FVL       | 3.99E-02 | 1.22E-02 | QSKSA     | 1.54E-01 | 1.24E-01 |
| RQPCO     | 3.51E-02 | 1.21E-02 | FQG       | 3.67E-01 | 1.24E-01 |
| PBBDCM    | 2.90E-02 | 1.30E-02 | LSK       | 1.37E-01 | 1.13E-01 |
| FQG       | 2.80E-02 | 8.45E-03 | PBBDCM    | 2.12E-01 | 1.10E-01 |
| QPC       | 2.72E-02 | 8.06E-03 | PSKBDCM   | 1.58E-01 | 1.09E-01 |
| FQL       | 2.43E-02 | 7.31E-03 | QPC       | 3.46E-01 | 1.07E-01 |
| KM1BDCM   | 2.25E-02 | 6.88E-03 | FQF       | 1.27E-01 | 8.00E-02 |
| FQF       | 1.61E-02 | 7.64E-03 | FQL       | 2.07E-01 | 6.87E-02 |
| PSKBDCM   | 1.33E-02 | 1.17E-02 | PPPBDCM   | 1.02E-01 | 5.40E-02 |
| DEADSPACE | 1.21E-02 | 3.61E-03 | DEADSPACE | 1.61E-01 | 4.98E-02 |
| IVVMAX1   | 1.16E-02 | 3.56E-03 | CYP2E1    | 1.14E-01 | 3.77E-02 |
| PLBDCM    | 1.13E-02 | 3.68E-03 | FVL       | 9.88E-02 | 3.54E-02 |
| QSKSA     | 1.12E-02 | 1.24E-02 | PRPBDCM   | 5.45E-02 | 3.51E-02 |
| LSK       | 1.01E-02 | 1.18E-02 | KM1BDCM   | 7.43E-02 | 2.44E-02 |
| PPPBDCM   | 7.97E-03 | 4.62E-03 | FVBD      | 2.72E-02 | 1.83E-02 |
| PRPBDCM   | 2.97E-03 | 2.77E-03 | PGBDCM    | 1.58E-02 | 1.54E-02 |
| PWSBDCM   | 2.70E-03 | 1.14E-03 | FVF       | 2.76E-02 | 1.47E-02 |
| PFBDCM    | 2.28E-03 | 1.79E-03 | PLBDCM    | 3.81E-02 | 1.36E-02 |
| FVF       | 2.12E-03 | 1.15E-03 | IVVMAX1   | 3.95E-02 | 1.30E-02 |
| FVBD      | 1.27E-03 | 1.20E-03 | FVGI      | 7.96E-03 | 1.04E-02 |
| PGBDCM    | 6.82E-04 | 8.31E-04 | PWSBDCM   | 1.71E-02 | 8.28E-03 |
| FVGI      | 3.06E-04 | 4.51E-04 | MPPGL     | 1.95E-02 | 6.42E-03 |
| PKBDCM    | 2.32E-04 | 2.22E-04 | PFBDCM    | 6.03E-03 | 5.24E-03 |
| FQK       | 9.84E-05 | 1.02E-04 | FQK       | 2.37E-03 | 2.08E-03 |
| MPPGL     | 4.91E-05 | 1.50E-05 | PKBDCM    | 2.62E-03 | 1.75E-03 |
| FVK       | 4.53E-05 | 4.61E-05 | FVK       | 6.32E-04 | 5.62E-04 |
| VFCBDCM   | 7.21E-06 | 2.86E-06 | VFCBDCM   | 2.96E-05 | 9.78E-06 |

<sup>1</sup>Parameter abbreviations are defined in Tables 1 and 2.  $\mu$  is the mean sensitivity measure over the course of the simulation and  $\sigma$  is the standard deviation of the sensitivity measure over the course of the simulation. Shading indicates division of parameters into thirds.



Table S9. Descriptive statistics for CYP2E1 Neonate simulations for oral exposure using 10 different random seeds (10,000 simulations each set)

| Mean | Stdev | Min      | Max   | 5 %ile | 95 %ile | IQR  | %CV | Max/Min  | Ratio95_5 |
|------|-------|----------|-------|--------|---------|------|-----|----------|-----------|
| 13.1 | 18.5  | 1.82E-07 | 184.2 | 0.0582 | 49.2    | 16.0 | 141 | 1.01E+09 | 844.54    |
| 13.4 | 18.2  | 2.12E-07 | 217.3 | 0.0583 | 50.7    | 16.8 | 136 | 1.02E+09 | 870.17    |
| 13.6 | 19.0  | 1.00E-08 | 230.9 | 0.0579 | 51.7    | 16.8 | 139 | 9.87E+11 | 891.87    |
| 13.2 | 18.5  | 1.87E-07 | 289.8 | 0.0562 | 49.2    | 16.3 | 141 | 1.55E+09 | 873.95    |
| 13.5 | 19.4  | 1.62E-06 | 192.8 | 0.0513 | 51.9    | 16.0 | 144 | 1.19E+08 | 1011.11   |
| 13.3 | 18.7  | 1.10E-07 | 192.1 | 0.0578 | 51.0    | 16.3 | 140 | 1.74E+09 | 882.5     |
| 13.3 | 18.4  | 2.00E-09 | 169.6 | 0.0599 | 50.7    | 16.6 | 138 | 9.04E+10 | 845.76    |
| 13.6 | 19.3  | 7.20E-08 | 204.3 | 0.0548 | 54.1    | 16.3 | 142 | 2.86E+09 | 986.48    |
| 13.6 | 19.3  | 2.23E-06 | 299.3 | 0.0613 | 52.1    | 16.5 | 142 | 1.34E+08 | 848.72    |
| 13.3 | 19.2  | 3.61E-06 | 234.8 | 0.0490 | 51.6    | 16.3 | 144 | 6.51E+07 | 1054.86   |

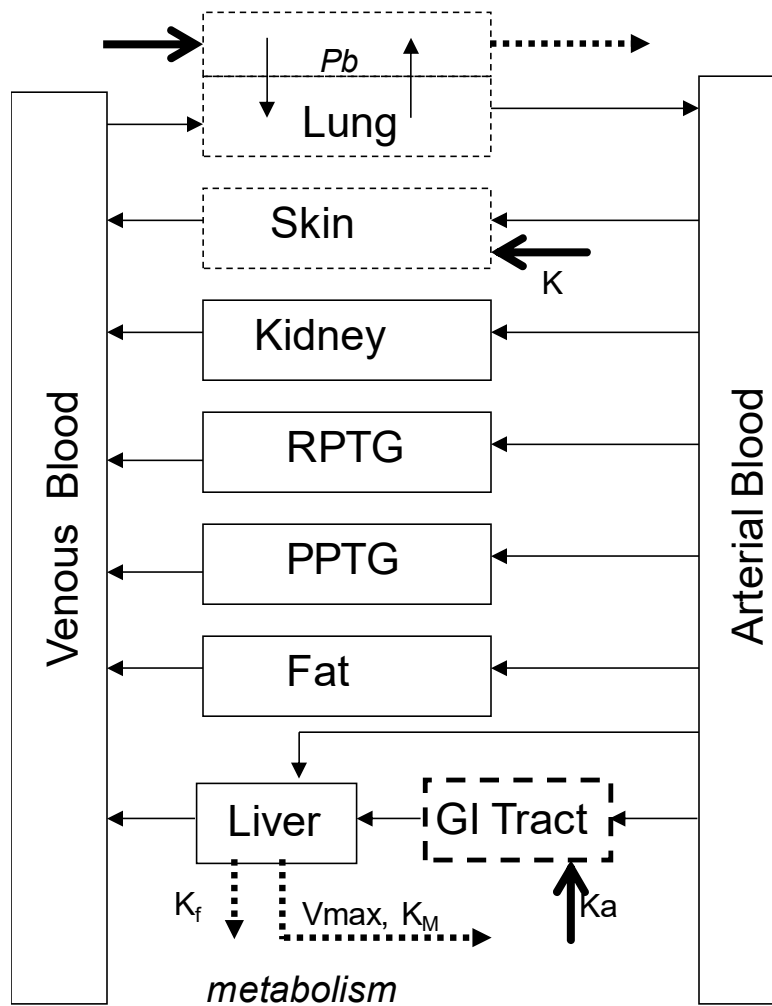

Fig S1. Schematic diagram of the human BDCM Model. Thick black arrows indicate routes of entry to specific tissue compartments (dotted lines). Thin solid lines and arrows indicate blood flow for organs connected by systemic circulation. Distribution is blood flow limited and there is no binding of BDCM to blood proteins.

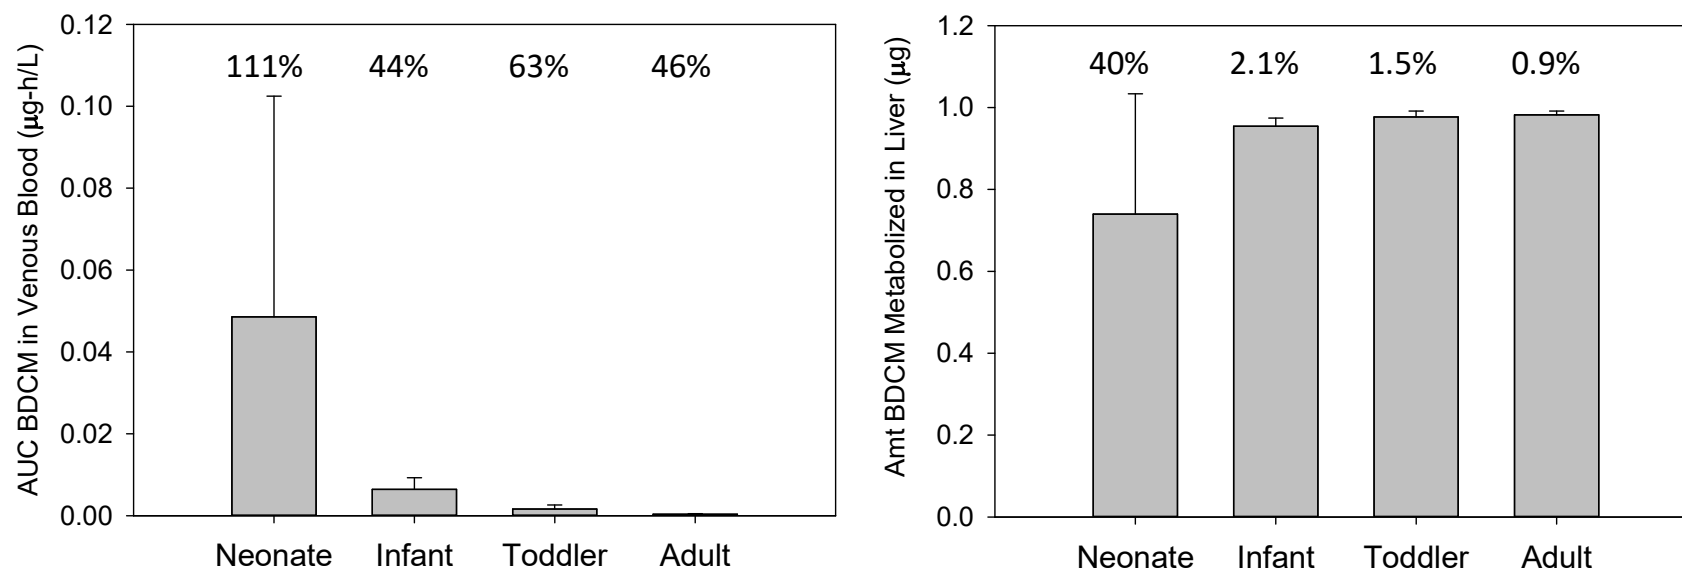

Fig S2. Comparison of AUC for (A) venous blood BDCM ( $\mu\text{g}\cdot\text{h}/\text{L}$ ,  $\bar{x} \pm \text{SD}$ ) and (B) amount of BDCM metabolized in liver ( $\mu\text{g}$ ,  $\bar{x} \pm \text{SD}$ ) across age groups based on Monte Carlo simulations (2 hours) utilizing the distributional characteristics for FVL, CYP2E1 and MPPGL shown in Table 3 for an oral exposure to water containing  $20 \mu\text{g}/\text{L}$  BDCM as a single 0.05-liter drink. The number associated with each bar is the coefficient of variation (%).

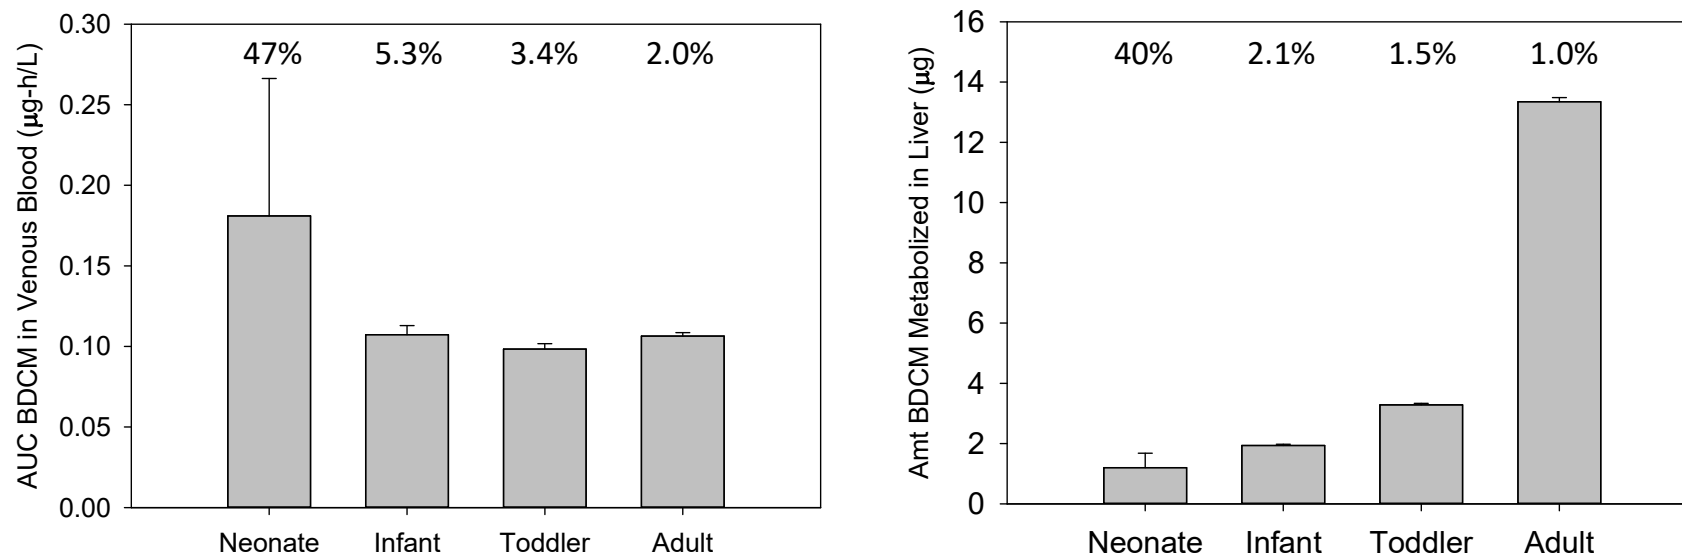

Fig S3. Comparison of AUC for (A) venous blood BDCM ( $\mu\text{g}\cdot\text{h}/\text{L}$ ,  $\bar{x} \pm \text{SD}$ ) and (B) amount BDCM metabolized in liver ( $\mu\text{g}$ ,  $\bar{x} \pm \text{SD}$ ) across age groups based on Monte Carlo simulations (2 hours) utilizing the distributional characteristics for FVL, CYP2E1 and MPPGL shown in Table 3 for a 20-minute bath in water containing  $20 \mu\text{g}/\text{L}$  BDCM. The number associated with each bar is the coefficient of variation (%).
